# Supplementary material for: Willingness and SARS-CoV-2 Vaccination Coverage among Healthcare Workers in China: A Nationwide Study
Source: MDPI journal article supplement (doi:10.3390/vaccines9090993), 2021-09-06
Supplement: s1 [file s1]

**Table S1. The characteristics of HCWs according to the records nationally**

| <b>Characteristics</b>  | <b>Total<br/>%</b> | <b>Doctor<br/>%</b> | <b>Nurse<br/>%</b> | <b>Public<br/>health<br/>%</b> | <b>Technician<br/>%</b> | <b>Administrator<br/>%</b> |
|-------------------------|--------------------|---------------------|--------------------|--------------------------------|-------------------------|----------------------------|
| <b>Gender</b>           |                    |                     |                    |                                |                         |                            |
| Male                    | 28.2               | 53.8                | 2.3                | 42.1                           | 40.4                    | 46.1                       |
| Female                  | 71.8               | 46.2                | 97.7               | 57.9                           | 59.6                    | 53.9                       |
| <b>Age group, years</b> |                    |                     |                    |                                |                         |                            |
| below 30                | 26.9               | 11.3                | 37.5               | 33.7                           | 24.1                    | 13.6                       |
| 30 to 39                | 32.2               | 28.3                | 34.6               | 35.7                           | 33.1                    | 25.7                       |
| 40 to 49                | 22.4               | 30.3                | 17.5               | 17.2                           | 22.5                    | 28.3                       |
| 50 or above             | 18.5               | 30.4                | 10.4               | 9.4                            | 20.3                    | 32.4                       |
| <b>Education</b>        |                    |                     |                    |                                |                         |                            |
| Below bachelor          | 24.6               | 17.9                | 30.2               | 26.3                           | 21.7                    | 21.0                       |
| Bachelor                | 69.9               | 70.1                | 69.7               | 68.0                           | 74.9                    | 73.9                       |
| Master or above         | 5.6                | 12.0                | 0.2                | 5.7                            | 3.4                     | 5.1                        |
| <b>Residence</b>        |                    |                     |                    |                                |                         |                            |
| Urban                   | 50.9               | 52.9                | 59.0               | 56.3                           | 53.6                    | 62.0                       |
| Rural                   | 49.1               | 47.1                | 41.0               | 43.7                           | 46.4                    | 38.0                       |

**Table S2. Vaccination Confidence, willingness and Coverage of the COVID-19 vaccine**

| Characteristics           | Confidence rate (n, %) |            |               |            |            |            |            | Willingness (n, %) | P          | Vaccination (n, %) | P |
|---------------------------|------------------------|------------|---------------|------------|------------|------------|------------|--------------------|------------|--------------------|---|
|                           | Vaccine                | P          | Professionals | P          | Government | p          |            |                    |            |                    |   |
| Gender                    |                        |            |               |            |            |            |            |                    |            |                    |   |
| Male                      | 698(79.0)              | 0.001      | 764(86.4)     | 0.190      | 762(86.2)  | 0.435      | 764(86.4)  | <0.001             | 625(70.7)  | <0.001             |   |
| Female                    | 1094(72.8)             |            | 1268(84.4)    |            | 1276(85.0) |            | 1165(77.6) |                    | 893(59.5)  |                    |   |
| Age group, years          |                        |            |               |            |            |            |            |                    |            |                    |   |
| below 30                  | 401(64.6)              | <0.001     | 492(79.2)     | <0.001     | 493(79.4)  | <0.001     | 486(78.3)  | 0.002              | 335(53.9)  | <0.001             |   |
| 30 to 39                  | 587(74.3)              |            | 655(82.9)     |            | 668(84.6)  |            | 616(78.0)  |                    | 501(63.4)  |                    |   |
| 40 to 49                  | 513(81.8)              |            | 575(91.7)     |            | 564(90.0)  |            | 538(85.8)  |                    | 454(72.4)  |                    |   |
| 50 or above               | 291(83.6)              |            | 310(89.1)     |            | 313(89.9)  |            | 289(83.0)  |                    | 228(65.5)  |                    |   |
| Education                 |                        |            |               |            |            |            |            |                    |            |                    |   |
| High school or below      | 126(78.8)              | 0.019      | 141(88.1)     | 0.004      | 144(90.0)  | 0.001      | 137(85.6)  | 0.004              | 100(62.5)  | 0.280              |   |
| Bachelor's degree         | 1283(76.2)             |            | 1453(86.3)    |            | 1456(86.5) |            | 1382(82.1) |                    | 1088(64.6) |                    |   |
| Master's or above         | 383(70.7)              |            | 438(80.8)     |            | 438(80.8)  |            | 410(75.6)  |                    | 330(60.9)  |                    |   |
| Residence                 |                        |            |               |            |            |            |            |                    |            |                    |   |
| Urban                     | 1364(74.9)             | 0.781      | 1542(84.7)    | 0.310      | 1545(84.9) | 0.220      | 1457(80.1) | 0.034              | 1185(65.1) | 0.008              |   |
| Rural                     | 428(75.6)              |            | 490(86.6)     |            | 493(87.1)  |            | 472(83.4)  |                    | 333(58.8)  |                    |   |
| Occupation                |                        |            |               |            |            |            |            |                    |            |                    |   |
| Doctors                   | 430(71.3)              | <0.001     | 496(82.3)     | <0.001     | 497(82.4)  | 0.016      | 479(79.4)  | <0.001             | 339(56.2)  | <0.001             |   |
| Nurse                     | 237(67.7)              |            | 284(81.1)     |            | 292(83.4)  |            | 259(74.0)  |                    | 201(57.4)  |                    |   |
| Public health             | 770(83.3)              |            | 826(89.4)     |            | 809(87.6)  |            | 814(88.1)  |                    | 706(76.4)  |                    |   |
| Medical technician        | 165(70.5)              |            | 201(85.9)     |            | 209(89.3)  |            | 185(79.1)  |                    | 128(54.7)  |                    |   |
| Administrative management | 190(69.1)              |            | 225(81.8)     |            | 231(84.0)  |            | 192(69.8)  |                    | 144(52.4)  |                    |   |
| Power of post hoc         |                        | 1.00       |               | 1.00       |            | 0.60       |            | 1.00               |            | 1.00               |   |
| Total                     |                        | 1792(75.1) |               | 2032(85.2) |            | 2038(85.4) |            | 1929(80.8)         |            | 1518(63.6)         |   |
| Power of post hoc         |                        | 1.00       |               | 1.00       |            | 1.00       |            | 1.00               |            | 1.00               |   |

**Table S3.** Reclassification and analysis of study participants through their vaccination willingness and uptake among participants without medical conditions or contraindications

| Characteristics    | Subgroup                                | Unwill & Unvac <sup>a</sup><br>(n, %) | Unwill & Vac <sup>b</sup><br>(n, %) | Willing & Unvac <sup>c</sup><br>(n, %) | Willing & Vac <sup>d</sup><br>(n, %) | P      | OR(95%CI)         |
|--------------------|-----------------------------------------|---------------------------------------|-------------------------------------|----------------------------------------|--------------------------------------|--------|-------------------|
| Gender             | Female                                  | 131(11.7)                             | 84(7.5)                             | 91(8.2)                                | 809(72.6)                            | <0.001 | Ref               |
|                    | Male                                    | 54(7.5)                               | 37(5.2)                             | 39(5.4)                                | 588(81.9)                            |        | 1.64(1.08-2.49)   |
| Age group, years   | below 30                                | 64(13.8)                              | 32(6.9)                             | 66(14.2)                               | 303(65.2)                            | <0.001 | Ref               |
|                    | 30 to 39                                | 62(10.4)                              | 48(8)                               | 34(5.7)                                | 453(75.9)                            |        | 3.14(2.14-4.62) ^ |
|                    | 40 to 49                                | 33(6.7)                               | 30(6)                               | 9(1.8)                                 | 424(85.5)                            |        | NA                |
|                    | 40 or above                             | 26(9.5)                               | 11(4)                               | 21(7.6)                                | 217(78.9)                            |        | NA                |
| Education          | High school or below                    | 11(9.3)                               | 4(3.4)                              | 7(5.9)                                 | 96(81.4)                             | 0.007  | Ref               |
|                    | Bachelor's degree                       | 112(8.6)                              | 85(6.6)                             | 97(7.5)                                | 1003(77.3)                           |        | 0.97(0.40-2.18)   |
|                    | Master's degree or above                | 62(14.8)                              | 32(7.7)                             | 26(6.2)                                | 298(71.3)                            |        | 1.10(0.42-2.83)   |
| Residence          | Urban                                   | 154(10.7)                             | 92(6.4)                             | 95(6.6)                                | 1093(76.2)                           | 0.165  | Ref               |
|                    | Rural                                   | 31(7.8)                               | 29(7.3)                             | 35(8.8)                                | 304(76.2)                            |        | 0.91(0.58-1.44)   |
| Occupation         | Doctors                                 | 52(12.1)                              | 26(6.1)                             | 38(8.9)                                | 313(73)                              | <0.001 | Ref               |
|                    | Nurse                                   | 31(12.2)                              | 26(10.2)                            | 23(9)                                  | 175(68.6)                            |        | 1.43(0.78-2.61)   |
|                    | Public health                           | 50(6.3)                               | 33(4.2)                             | 33(4.2)                                | 673(85.3)                            |        | 2.43(1.46-4.04)   |
|                    | Medical technician                      | 17(10.5)                              | 12(7.4)                             | 17(10.5)                               | 116(71.6)                            |        | 1.04(0.55-1.97)   |
|                    | Administrative management               | 35(17.7)                              | 24(12.1)                            | 19(9.6)                                | 120(60.6)                            |        | 0.80(0.43-1.49)   |
| Vaccine confidence | No confidence in any of 3 dimensions    | 71(37)                                | 43(22.4)                            | 16(8.3)                                | 62(32.3)                             | <0.001 | Ref               |
|                    | Confidence in any 1 of the 3 dimensions | 21(26.9)                              | 19(24.4)                            | 5(6.4)                                 | 33(42.3)                             |        | 1.75(0.56-5.48)   |
|                    | Confidence in any 2 of the 3 dimensions | 51(23.1)                              | 26(11.8)                            | 15(6.8)                                | 129(58.4)                            |        | 2.19(0.98-4.90)   |
|                    | Confidence in all of the 3 dimensions   | 42(3.1)                               | 33(2.5)                             | 94(7)                                  | 1173(87.4)                           |        | 2.31(1.24-4.33)   |
| Total              |                                         | 185(10.1)                             | 121(6.6)                            | 130(7.1)                               | 1397(76.2)                           |        |                   |

Note: <sup>a</sup>: the subgroup of unvaccinated participants reported unwillingness to vaccination; <sup>b</sup>: the subgroup of vaccinated participants reported unwillingness to vaccination; <sup>c</sup>: the subgroup of unvaccinated participants reported willingness to vaccination; <sup>d</sup>: the subgroup of vaccinated participants reported willingness to vaccination; ^: those aged over 30 years were combined into one group as “aged over 30 years” and introduced into the logistic regression model.

**Table S4. Confidence in COVID-19 vaccine among different demographic characteristics**

| Characteristics           | Confidence in vaccine |        |            |        |               |        |
|---------------------------|-----------------------|--------|------------|--------|---------------|--------|
|                           | Importance            | P      | Safety     | P      | Effectiveness | P      |
| <b>Gender</b>             |                       |        |            |        |               |        |
| Male                      | 734(83)               | 0.092  | 677(76.6)  | <0.001 | 687(77.7)     | <0.001 |
| Female                    | 1204(80.2)            |        | 1039(69.2) |        | 1065(70.9)    |        |
| <b>Age group, years</b>   |                       |        |            |        |               |        |
| below 30                  | 482(77.6)             | 0.008  | 367(59.1)  | <0.001 | 393(63.3)     | <0.001 |
| 30 to 39                  | 634(80.3)             |        | 562(71.1)  |        | 568(71.9)     |        |
| 40 to 49                  | 528(84.2)             |        | 506(80.7)  |        | 506(80.7)     |        |
| 50 or above               | 294(84.5)             |        | 281(80.7)  |        | 285(81.9)     |        |
| <b>Education</b>          |                       |        |            |        |               |        |
| High school or below      | 140(87.5)             | 0.003  | 117(73.1)  | 0.433  | 123(76.9)     | 0.007  |
| Bachelor's degree         | 1381(82)              |        | 1221(72.5) |        | 1259(74.8)    |        |
| Master's or above         | 417(76.9)             |        | 378(69.7)  |        | 370(68.3)     |        |
| <b>Residence</b>          |                       |        |            |        |               |        |
| Urban                     | 1478(81.2)            | 0.973  | 1316(72.3) | 0.454  | 1327(72.9)    | 0.327  |
| Rural                     | 460(81.3)             |        | 400(70.7)  |        | 425(75.1)     |        |
| <b>Occupation</b>         |                       |        |            |        |               |        |
| Doctors                   | 464(76.9)             | <0.001 | 417(69.2)  | <0.001 | 414(68.7)     | <0.001 |
| Nurse                     | 271(77.4)             |        | 220(62.9)  |        | 232(66.3)     |        |
| Public health             | 797(86.3)             |        | 743(80.4)  |        | 749(81.1)     |        |
| Medical technician        | 188(80.3)             |        | 158(67.5)  |        | 162(69.2)     |        |
| Administrative management | 218(79.3)             |        | 178(64.7)  |        | 195(70.9)     |        |
| <b>Total</b>              | 1938(81.2)            |        | 1716(71.9) |        | 1752(73.4)    |        |

**Table S5. Confidence in professional institutes and government among different demographic characteristics**

| Characteristics           | Professionals |        |              |        |             |        | Government | P      |  |
|---------------------------|---------------|--------|--------------|--------|-------------|--------|------------|--------|--|
|                           | Healthcare    | P      | Hospital/CDC | P      | Manufacture | P      |            |        |  |
| Gender                    |               |        |              |        |             |        |            |        |  |
| Male                      | 754(85.3)     | 0.166  | 775(87.7)    | 0.174  | 732(82.8)   | 0.094  | 762(86.2)  | 0.435  |  |
| Female                    | 1248(83.1)    |        | 1286(85.6)   |        | 1201(80)    |        | 1276(85)   |        |  |
| Age group, years          |               |        |              |        |             |        |            |        |  |
| below 30                  | 483(77.8)     | <0.001 | 498(80.2)    | <0.001 | 461(74.2)   | <0.001 | 493(79.4)  | <0.001 |  |
| 30 to 39                  | 645(81.6)     |        | 671(84.9)    |        | 629(79.6)   |        | 668(84.6)  |        |  |
| 40 to 49                  | 566(90.3)     |        | 579(92.3)    |        | 547(87.2)   |        | 564(90)    |        |  |
| 50 or above               | 308(88.5)     |        | 313(89.9)    |        | 296(85.1)   |        | 313(89.9)  |        |  |
| Education                 |               |        |              |        |             |        |            |        |  |
| High school or below      | 139(86.9)     | 0.018  | 143(89.4)    | 0.012  | 131(81.9)   | 0.011  | 144(90)    | 0.001  |  |
| Bachelor's degree         | 1429(84.9)    |        | 1470(87.3)   |        | 1387(82.4)  |        | 1456(86.5) |        |  |
| Master's or above         | 434(80.1)     |        | 448(82.7)    |        | 415(76.6)   |        | 438(80.8)  |        |  |
| Residence                 |               |        |              |        |             |        |            |        |  |
| Urban                     | 1525(83.8)    | 0.844  | 1569(86.2)   | 0.726  | 1464(80.4)  | 0.220  | 1545(84.9) | 0.220  |  |
| Rural                     | 477(84.3)     |        | 492(86.9)    |        | 469(82.9)   |        | 493(87.1)  |        |  |
| Occupation                |               |        |              |        |             |        |            |        |  |
| Doctors                   | 492(81.6)     | <0.001 | 501(83.1)    | 0.001  | 477(79.1)   | 0.001  | 497(82.4)  | 0.016  |  |
| Nurse                     | 281(80.3)     |        | 292(83.4)    |        | 268(76.6)   |        | 292(83.4)  |        |  |
| Public health             | 814(88.1)     |        | 832(90)      |        | 787(85.2)   |        | 809(87.6)  |        |  |
| Medical technician        | 195(83.3)     |        | 204(87.2)    |        | 188(80.3)   |        | 209(89.3)  |        |  |
| Administrative management | 220(80)       |        | 232(84.4)    |        | 213(77.5)   |        | 231(84)    |        |  |
| Total                     | 2002(83.9)    |        | 2061(86.4)   |        | 1933(81.0)  |        | 2038(85.4) |        |  |

**Table S6. Willingness rate of the COVID-19 vaccination grouped by vaccine confidence**

| Characteristics                               |          | Total<br>(n=2386) | Doctor<br>(n=603) | Nurse<br>(n=350) | CDC<br>(n=924) | Tech<br>(n=234) | Admin<br>(n=275) | P-value |
|-----------------------------------------------|----------|-------------------|-------------------|------------------|----------------|-----------------|------------------|---------|
| <b>Total</b>                                  |          | 1929(80.8)        | 479(79.4)         | 259(74.0)        | 814(88.1)      | 185(79.1)       | 192(69.8)        | <0.001  |
| <b>Trust in the importance of vaccination</b> |          |                   |                   |                  |                |                 |                  |         |
|                                               | Disagree | 218(48.7)         | 65(46.8)          | 38(48.1)         | 72(56.7)       | 21(45.7)        | 22(38.6)         | 0.202   |
|                                               | Agree    | 1711(88.3)        | 414(89.2)         | 221(81.5)        | 742(93.1)      | 164(87.2)       | 170(78.0)        | <0.001  |
| <b>Confidence on vaccine safety</b>           |          |                   |                   |                  |                |                 |                  |         |
|                                               | Disagree | 340(50.7)         | 88(47.3)          | 59(45.4)         | 113(62.4)      | 43(56.6)        | 37(38.1)         | 0.001   |
|                                               | Agree    | 1589(92.6)        | 391(93.8)         | 200(90.9)        | 701(94.3)      | 142(89.9)       | 155(87.1)        | 0.005   |
| <b>Confidence on vaccine effectiveness</b>    |          |                   |                   |                  |                |                 |                  |         |
|                                               | Disagree | 335(52.8)         | 98(51.9)          | 59(50)           | 100(57.1)      | 45(62.5)        | 33(41.3)         | 0.067   |
|                                               | Agree    | 1594(91.0)        | 381(92)           | 200(86.2)        | 714(95.3)      | 140(86.4)       | 159(81.5)        | <0.001  |
| <b>Confidence on healthcare provider</b>      |          |                   |                   |                  |                |                 |                  |         |
|                                               | Disagree | 179(46.6)         | 48(43.2)          | 27(39.1)         | 63(57.3)       | 22(56.4)        | 19(34.5)         | 0.019   |
|                                               | Agree    | 1750(87.4)        | 431(87.6)         | 232(82.6)        | 751(92.3)      | 163(83.6)       | 173(78.6)        | <0.001  |
| <b>Confidence on CDCs &amp; hospitals</b>     |          |                   |                   |                  |                |                 |                  |         |
|                                               | Disagree | 143(44.0)         | 42(41.2)          | 22(37.9)         | 51(55.4)       | 14(46.7)        | 14(32.6)         | 0.076   |
|                                               | Agree    | 1786(86.7)        | 437(87.2)         | 237(81.2)        | 763(91.7)      | 171(83.8)       | 178(76.7)        | <0.001  |
| <b>Confidence on vaccine manufacturers</b>    |          |                   |                   |                  |                |                 |                  |         |
|                                               | Disagree | 211(46.6)         | 56(44.4)          | 35(42.7)         | 77(56.2)       | 22(47.8)        | 21(33.9)         | 0.042   |
|                                               | Agree    | 1718(88.9)        | 423(88.7)         | 224(83.6)        | 737(93.6)      | 163(86.7)       | 171(80.3)        | <0.001  |
| <b>Confidence on the government</b>           |          |                   |                   |                  |                |                 |                  |         |
|                                               | Disagree | 145(41.7)         | 44(41.5)          | 20(34.5)         | 60(52.2)       | 10(40.0)        | 11(25.0)         | 0.021   |
|                                               | Agree    | 1784(87.5)        | 435(87.5)         | 239(81.8)        | 754(93.2)      | 175(83.7)       | 181(78.4)        | <0.001  |

Note: CDC, employees belong to public health; Tech, employees belong to medical technician; Admin, employees belong to administrative management.

**Table S7.**Supplemental Table Logistic regression on willingness among **Doctors**

| <b>Characteristics</b>      | <b>Willingness among Doctors</b> |              |          |
|-----------------------------|----------------------------------|--------------|----------|
|                             | <b>OR</b>                        | <b>95%CI</b> | <b>P</b> |
| <b>Gender</b>               |                                  |              |          |
| Male                        | Ref.                             |              | 0.035    |
| Female                      | 0.56                             | 0.33-0.96    |          |
| <b>Age group, years</b>     |                                  |              |          |
| below 30                    | Ref.                             |              | 0.977    |
| 30 to 39                    | 0.91                             | 0.48-1.74    | 0.777    |
| 40 to 49                    | 0.93                             | 0.45-1.92    | 0.841    |
| 50 or above                 | 0.82                             | 0.33-2.03    | 0.665    |
| <b>Education</b>            |                                  |              |          |
| High school or below        | Ref.                             |              | 0.263    |
| Bachelor's degree           | 0.17                             | 0.02-1.50    | 0.109    |
| Master's or above           | 0.18                             | 0.02-1.80    | 0.145    |
| <b>Residence</b>            |                                  |              |          |
| Urban                       | Ref.                             |              | 0.195    |
| Rural                       | 1.58                             | 0.79-3.15    |          |
| <b>Confidence</b>           |                                  |              |          |
| Importance of vaccination   | 2.69                             | 1.50-4.83    | 0.001    |
| Vaccine safety              | 6.45                             | 3.39-12.26   | <0.001   |
| Vaccine effectiveness       | 1.57                             | 0.80-3.07    | 0.186    |
| Confidence in professionals | 1.10                             | 0.50-2.42    | 0.814    |
| Confidence in government    | 2.42                             | 1.15-5.08    | 0.020    |

**Table S8.**Supplemental Table Logistic regression on willingness among Nurses

| Characteristics         |                             | Willingness among Nurse |            |        |
|-------------------------|-----------------------------|-------------------------|------------|--------|
|                         |                             | OR                      | 95%CI      | P      |
| <b>Gender</b>           |                             |                         |            |        |
|                         | Male                        | Ref.                    |            | 0.059  |
|                         | Female                      | 0.29                    | 0.08-1.05  |        |
| <b>Age group, years</b> |                             |                         |            |        |
|                         | below 30                    | Ref.                    |            | 0185   |
|                         | 30 to 39                    | 0.44                    | 0.21-0.93  | 0.031  |
|                         | 40 to 49                    | 0.50                    | 0.19-1.28  | 0.147  |
|                         | 50 or above                 | 0.59                    | 0.16-2.19  | 0.431  |
| <b>Residence</b>        |                             |                         |            |        |
|                         | Urban                       | Ref.                    |            | 0.390  |
|                         | Rural                       | 1.32                    | 0.70-2.50  |        |
| <b>Confidence</b>       |                             |                         |            |        |
|                         | Importance of vaccination   | 0.74                    | 0.32-1.70  | 0.471  |
|                         | Vaccine safety              | 9.52                    | 4.17-21.76 | <0.001 |
|                         | Vaccine effectiveness       | 1.34                    | 0.58-3.05  | 0.493  |
|                         | Confidence in professionals | 1.19                    | 0.42-3.34  | 0.740  |
|                         | Confidence in government    | 2.87                    | 1.03-8.04  | 0.045  |



**Table S9.**Supplemental Table Logistic regression on willingness among **Public health employees**

| Characteristics             | Willingness among Public health employees |            |        |
|-----------------------------|-------------------------------------------|------------|--------|
|                             | OR                                        | 95%CI      | P      |
| <b>Gender</b>               |                                           |            |        |
| Male                        | Ref.                                      |            | 0.026  |
| Female                      | 0.56                                      | 0.34-0.93  |        |
| <b>Age group, years</b>     |                                           |            |        |
| below 30                    | Ref.                                      |            | 0.060  |
| 30 to 39                    | 0.80                                      | 0.41-1.57  | 0.516  |
| 40 to 49                    | 0.97                                      | 0.48-1.99  | 0.942  |
| 50 or above                 | 0.39                                      | 0.18-0.85  | 0.018  |
| <b>Education</b>            |                                           |            |        |
| High school or below        | Ref.                                      |            | 0.205  |
| Bachelor's degree           | 0.96                                      | 0.34-2.74  | 0.938  |
| Master's or above           | 0.58                                      | 0.18-1.84  | 0.352  |
| <b>Residence</b>            |                                           |            |        |
| Urban                       | Ref.                                      |            | 0.972  |
| Rural                       | 0.99                                      | 0.51-1.91  |        |
| <b>Confidence</b>           |                                           |            |        |
| Importance of vaccination   | 2.33                                      | 1.22-4.48  | 0.011  |
| Vaccine safety              | 2.21                                      | 1.17-4.15  | 0.014  |
| Vaccine effectiveness       | 5.84                                      | 3.08-11.11 | <0.001 |
| Confidence in professionals | 0.33                                      | 0.12-0.91  | 0.031  |
| Confidence in government    | 3.72                                      | 1.46-9.50  | 0.006  |

**Table S10.**Supplemental Table Logistic regression on willingness among **Medical technicians**

| Characteristics             | Willingness among Medical technicians |            |       |
|-----------------------------|---------------------------------------|------------|-------|
|                             | OR                                    | 95%CI      | P     |
| <b>Gender</b>               |                                       |            |       |
| Male                        | Ref.                                  |            |       |
| Female                      | 0.95                                  | 0.43-2.13  | 0.905 |
| <b>Age group, years</b>     |                                       |            |       |
| below 30                    | Ref.                                  |            | 0.316 |
| 30 to 39                    | 0.45                                  | 0.17-1.14  | 0.092 |
| 40 to 49                    | 0.43                                  | 0.15-1.30  | 0.136 |
| 50 or above                 | 0.42                                  | 0.10-1.69  | 0.223 |
| <b>Education</b>            |                                       |            |       |
| High school or below        | Ref.                                  |            | 0.149 |
| Bachelor's degree           | 0.19                                  | 0.02-2.04  | 0.170 |
| Master's or above           | 0.11                                  | 0.01-1.29  | 0.078 |
| <b>Residence</b>            |                                       |            |       |
| Urban                       | Ref.                                  |            |       |
| Rural                       | 0.66                                  | 0.25-1.74  | 0.400 |
| <b>Confidence</b>           |                                       |            |       |
| Importance of vaccination   | 4.25                                  | 1.64-10.98 | 0.003 |
| Vaccine safety              | 4.25                                  | 1.64-11.02 | 0.003 |
| Vaccine effectiveness       | 0.66                                  | 0.24-1.86  | 0.434 |
| Confidence in professionals | 1.85                                  | 0.46-7.50  | 0.390 |
| Confidence in government    | 1.10                                  | 0.26-4.61  | 0.898 |

**Table S11.**Supplemental Table Logistic regression on willingness among **Administrators**

| <b>Characteristics</b>      | <b>Willingness among Administrators</b> |              |          |
|-----------------------------|-----------------------------------------|--------------|----------|
|                             | <b>OR</b>                               | <b>95%CI</b> | <b>P</b> |
| <b>Gender</b>               |                                         |              |          |
| Male                        | Ref.                                    |              |          |
| Female                      | 0.59                                    | 0.29-1.18    | 0.905    |
| <b>Age group, years</b>     |                                         |              |          |
| below 30                    | Ref.                                    |              | 0.378    |
| 30 to 39                    | 0.68                                    | 0.30-1.53    | 0.349    |
| 40 to 49                    | 1.06                                    | 0.41-2.77    | 0.901    |
| 50 or above                 | 0.44                                    | 0.14-1.35    | 0.150    |
| <b>Education</b>            |                                         |              |          |
| High school or below        | Ref.                                    |              | 0.024    |
| Bachelor's degree           | 0.24                                    | 0.06-0.92    | 0.037    |
| Master's or above           | 0.13                                    | 0.03-0.57    | 0.017    |
| <b>Residence</b>            |                                         |              |          |
| Urban                       | Ref.                                    |              |          |
| Rural                       | 0.81                                    | 0.33-1.96    | 0.639    |
| <b>Confidence</b>           |                                         |              |          |
| Importance of vaccination   | 2.28                                    | 1.02-5.09    | 0.044    |
| Vaccine safety              | 5.89                                    | 2.57-13.51   | <0.001   |
| Vaccine effectiveness       | 1.02                                    | 0.41-2.55    | 0.970    |
| Confidence in professionals | 0.89                                    | 0.28-2.79    | 0.841    |
| Confidence in government    | 4.14                                    | 1.29-13.28   | 0.017    |

**Table S12.**Supplemental Table Logistic regression on willingness among **total sample**

| Characteristics             | Willingness among Total sample |           |        |
|-----------------------------|--------------------------------|-----------|--------|
|                             | OR                             | 95%CI     | P      |
| <b>Gender</b>               |                                |           |        |
| Male                        | Ref.                           |           | <0.001 |
| Female                      | 0.53                           | 0.40-0.69 |        |
| <b>Age group, years</b>     |                                |           |        |
| below 30                    | Ref.                           |           | 0.020  |
| 30 to 39                    | 0.67                           | 0.49-0.92 | 0.012  |
| 40 to 49                    | 0.85                           | 0.59-1.22 | 0.371  |
| 50 or above                 | 0.57                           | 0.37-0.87 | 0.566  |
| <b>Education</b>            |                                |           |        |
| High school or below        | Ref.                           |           | 0.128  |
| Bachelor's degree           | 0.82                           | 0.48-1.42 | 0.479  |
| Master's or above           | 0.62                           | 0.34-1.13 | 0.119  |
| <b>Residence</b>            |                                |           |        |
| Urban                       | Ref.                           |           | .386   |
| Rural                       | 1.15                           | 0.84-1.57 |        |
| <b>Confidence</b>           |                                |           |        |
| Importance of vaccination   | 2.07                           | 1.52-2.81 | <0.001 |
| Vaccine safety              | 4.94                           | 3.60-6.78 | <0.001 |
| Vaccine effectiveness       | 1.88                           | 1.35-2.61 | <0.001 |
| Confidence in professionals | 0.92                           | 0.60-1.42 | 0.701  |
| Confidence in government    | 2.18                           | 1.45-3.28 | <0.001 |
